# Supplementary material for: Sugar-Sweetened Beverages and Risk of Metabolic Syndrome and Type 2 Diabetes
Source: Oxford University Press journal article supplement (doi:10.2337/dc10-1079), 2010-08-06
Supplement: dc101079onlineappendix.pdf [file dc101079onlineappendix.pdf]

### Supplemental Figure 1a

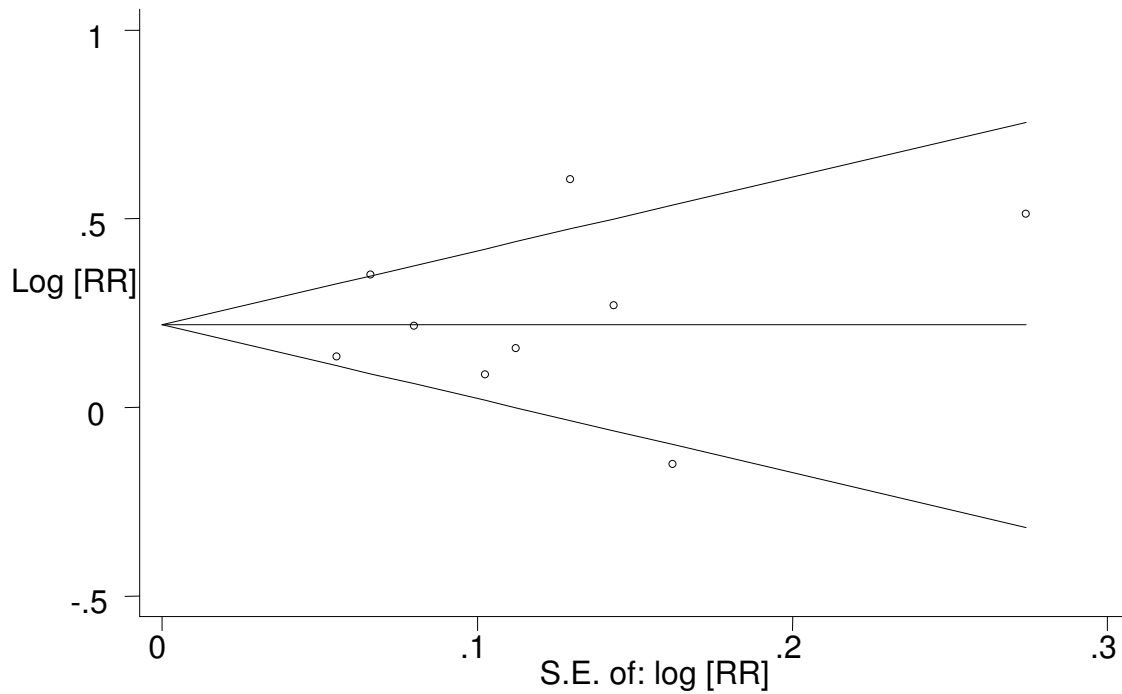

Begg's funnel plot of SSB consumption and risk of T2DM with pseudo 95% confidence limits around the summary estimate of the treatment effect, derived using fixed-effect meta-analysis. S.E. of log RR (measure of study size) from each study is plotted against log RR (treatment effect). Symmetry about the plot suggests that publication bias is unlikely, however the study with a large SE and large effect may suggest presence of a small-study effect (the tendency for smaller studies in a meta-analysis to show larger treatment effects).

### Supplemental Figure 1b

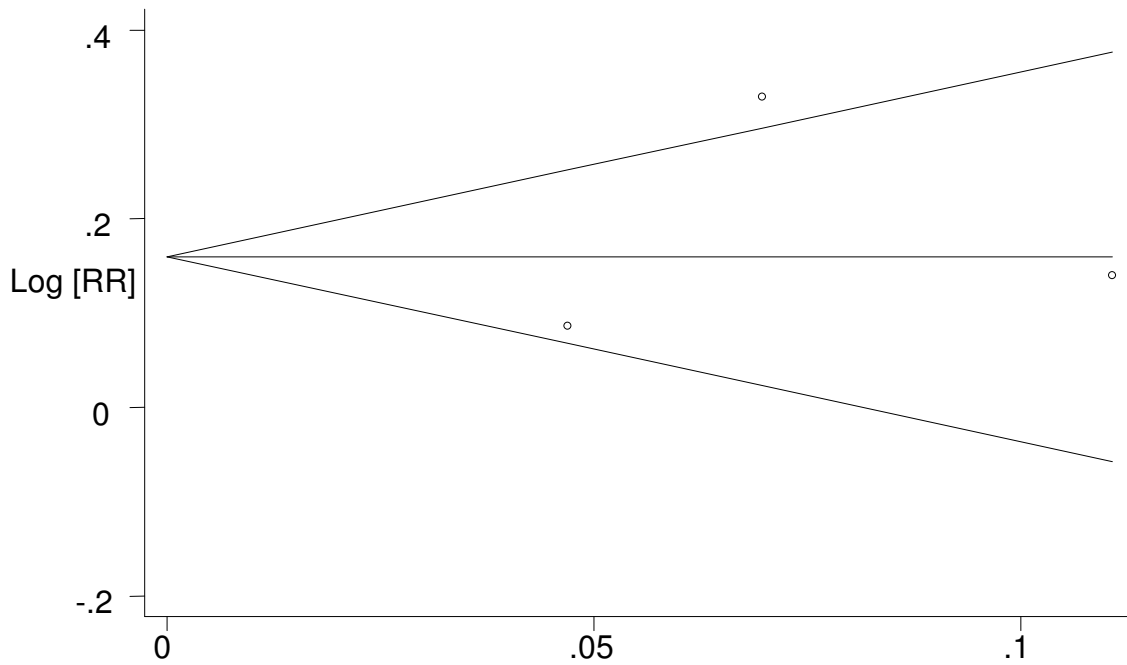

Begg's funnel plot of SSB consumption and risk of T2DM with pseudo 95% confidence limits around the summary estimate of the treatment effect, derived using fixed-effect meta-analysis. S.E. of log RR (measure of study size) from each study is plotted against log RR (treatment effect). Inference from this plot is limited due to small number of studies included however, the study with a large SE and large effect may suggest presence of a small-study effect (the tendency for smaller studies in a meta-analysis to show larger treatment effects).
